# Supplementary material for: A Nitrogen-Rich Covalent Triazine Framework as a Photocatalyst for Hydrogen Production
Source: Hindawi journal article supplement (doi:10.1155/2020/7819049), 2020-05-07
Supplement: f1 [file 7819049.f1.pdf]

## Supplementary Material

### A Nitrogen Rich Covalent Triazine Framework as Photocatalyst for Hydrogen Production

Ruizhi Gong<sup>a</sup>, Liuliu Yang<sup>a</sup>, Shuo Qiu<sup>a</sup>, Wan-Ting Chen<sup>b</sup>, Qing Wang<sup>b</sup>, Jiazhao Xie<sup>d</sup>, Geoffrey I.N. Waterhouse<sup>a,b,c,\*</sup>, Jing Xu<sup>a\*</sup>

<sup>a</sup>College of Chemistry and Material Science, Shandong Agricultural University, Tai'an, Shandong 271018, PR China

<sup>b</sup>School of Chemical Sciences, The University of Auckland, Auckland, New Zealand.

<sup>c</sup>The MacDiarmid Institute for Advanced Materials and Nanotechnology, New Zealand.

<sup>d</sup>College of Resources and Environment, Shandong Agricultural University, Tai'an, Shandong 271018, PR China

\*Corresponding authors:

Prof. Jing Xu

Email: [jjaxu@sdau.edu.cn](mailto:jjaxu@sdau.edu.cn)

Telephone number: 86 538 8249248

E-mail: 86 538 8242251

Prof. Geoffrey I.N. Waterhouse

Email: [g.waterhouse@auckland.ac.nz](mailto:g.waterhouse@auckland.ac.nz)

Telephone number: 64-9-9237212

Fax number: 64-9-373 7422

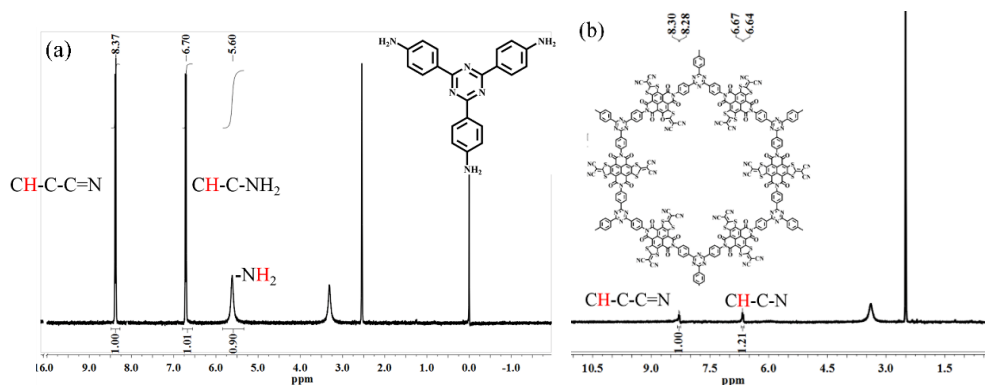

FIGURE S1:  $^1\text{H}$  NMR spectra for (a) TAPT and (b) CTF-CN. The samples were dissolved in deuterated DMSO for the analyses.

TAPT has 3 unique proton environments, giving rise to signals with chemical shifts  $\delta = 8.37$ , 6.70 and 5.60 ppm. These are present in a 1:1:1 area ratio. In the  $^1\text{H}$  NMR spectrum of CTF-CN, environments CH-C-C=N (8.30, 8.28 ppm) and CH-C-N (6.67, 6.64 ppm) remain, but environment the  $-\text{NH}_2$  signal has been lost, confirming the successful incorporation of TAPT into the CTF-CN structure.

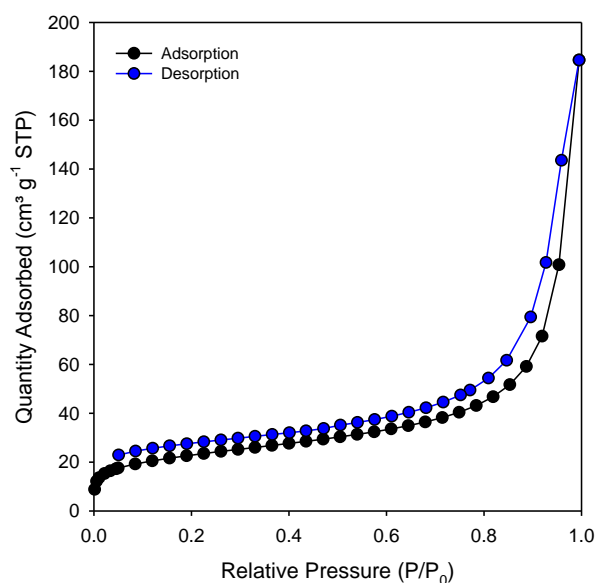

FIGURE S2:  $\text{N}_2$  adsorption and desorption isotherms for CTF-CN collected at 77 K.

TABLE S1: Summarised XPS chemical composition data for CTF-CN, its precursors and g-C<sub>3</sub>N<sub>4</sub> reference photocatalyst. Data for Pt/CTF-CN and Pt/g-C<sub>3</sub>N<sub>4</sub> is also included.

| Sample                             | Atom % |      |      |      |      |      |     |
|------------------------------------|--------|------|------|------|------|------|-----|
|                                    | C      | N    | O    | Br   | Na   | S    | Pt  |
| TBNDAs                             | 65.9   | -    | 21.2 | 13.0 | -    | -    | -   |
| Na <sub>2</sub> (i-mnt)            | 51.3   | 9.5  | 16.3 | -    | 10.3 | 12.6 | -   |
| TAPT                               | 80.2   | 16.2 | 3.5  | -    | -    | -    | -   |
| CTF-CN                             | 76.8   | 8.4  | 10.2 | 0.6  | -    | 4.0  | -   |
| Pt/CTF-CN                          | 74.9   | 8.5  | 12.9 | 0.3  | -    | 3.3  | 0.1 |
| g-C <sub>3</sub> N <sub>4</sub>    | 47.9   | 49.4 | 2.8  | -    | -    | -    | -   |
| Pt/g-C <sub>3</sub> N <sub>4</sub> |        |      |      | -    | -    | -    | -   |

TABLE S2: N 1s peak position for different N environments.

| N environment            | Peak position (eV) |
|--------------------------|--------------------|
| pyridinic N              | 398.3              |
| amine (NH <sub>2</sub> ) | 399.3              |
| pyridinic NH             | 399.7              |
| NC=O                     | 400.3              |
| graphitic N              | 400.9              |
| C-N                      | 401.3              |
| cyano (C≡N)              | 401.9              |
| pyridinic oxide          | 402.6              |
| $\pi$ - $\pi^*$          | 404.0              |

TABLE S3: C 1s peak position for different C environments.

| <b>C environment</b> | <b>Peak position<br/>(eV)</b> |
|----------------------|-------------------------------|
| C=C/C-C              | 284.9                         |
| C-N/C≡N/C-S          | 286.0                         |
| C-Br                 | 286.6                         |
| N=C-N                | 288.2                         |
| O-C=O                | 288.4                         |
| $\pi$ - $\pi^*$      | 290.3                         |
| $\pi$ - $\pi^*$      | 291.4                         |

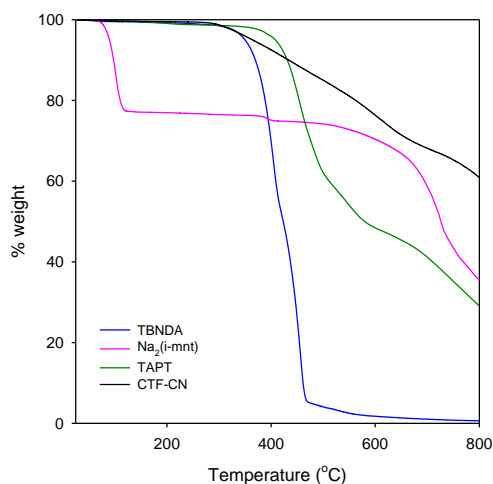

FIGURE S3: TGA data for CTF-CN and the starting materials used in the synthesis of CTF-CN.

All data was collected at a heating rate of  $10\text{ }^{\circ}\text{C min}^{-1}$  under a  $\text{N}_2$  atmosphere.

The TGA data shows that CTF-CN is stable up to  $\sim 350\text{ }^{\circ}\text{C}$ , confirming that the material has excellent thermal stability.

TABLE S4: Summarized  $\text{H}_2$  production data for Pt/CTF-CN and Pt/g- $\text{C}_3\text{N}_4$  photocatalysts.

| Photocatalyst                | Run # | Surface area ( $\text{m}^2\text{ g}^{-1}$ ) | $\text{H}_2$ production rate ( $\mu\text{mol g}^{-1}\text{ h}^{-1}$ ) | $\text{H}_2$ production rate ( $\mu\text{mol m}^{-2}\text{ h}^{-1}$ ) |
|------------------------------|-------|---------------------------------------------|-----------------------------------------------------------------------|-----------------------------------------------------------------------|
| Pt/CTF-CN                    | Run 1 | 96.0                                        | 484.7                                                                 | 5.049                                                                 |
| Pt/CTF-CN                    | Run 2 | 96.0                                        | 468.4                                                                 | 4.879                                                                 |
| Pt/CTF-CN                    | Run 3 | 96.0                                        | 481.3                                                                 | 5.014                                                                 |
| Pt/CTF-CN                    | Run 4 | 96.0                                        | 479.9                                                                 | 5.000                                                                 |
| Pt/CTF-CN*                   | -     | 96.0                                        | 478.6                                                                 | 4.985                                                                 |
| Pt/g- $\text{C}_3\text{N}_4$ | -     | 108.3                                       | 1088.8                                                                | 10.054                                                                |

\* $\text{H}_2$  production data is the mean of runs 1-4.

TABLE S5: Performance comparison of different covalent triazine framework (CTF)-based photocatalysts for H<sub>2</sub> production under visible ( $\lambda > 420$  nm) or UV-visible irradiation.

| Catalyst           | Co-catalyst | Sacrificial Agent      | Solvent                             | Light source       | H <sub>2</sub> rate<br>( $\mu\text{mol g}^{-1} \text{h}^{-1}$ ) | Ref       |
|--------------------|-------------|------------------------|-------------------------------------|--------------------|-----------------------------------------------------------------|-----------|
| PCTF-8             | Pt          | TEOA                   | pH 7 PBS                            | 300 W Xe           | 119                                                             | 30        |
| PCTF-8             | Pt          | MeOH                   | pH 7 PBS                            | 300 W Xe           | 89                                                              | 30        |
| CTF-1_10           | Pt          | TEOA                   | H <sub>2</sub> O/CH <sub>3</sub> CN | 300 W Xe           | 1072                                                            | 26        |
| CTF-1_30           | Pt          | TEOA                   | H <sub>2</sub> O/CH <sub>3</sub> CN | 300 W Xe           | 138                                                             | 26        |
| CTF-HUST-1         | Pt          | TEOA                   | Water                               | 300 W Xe           | 1460                                                            | 19        |
| CTF-HUST-2         | Pt          | TEOA                   | Water                               | 300 W Xe           | 2647                                                            | 19        |
| CTF-HUST-3         | Pt          | TEOA                   | Water                               | 300 W Xe           | 1238                                                            | 19        |
| CTF-HUST-4         | Pt          | TEOA                   | Water                               | 300 W Xe           | 1582                                                            | 19        |
| CTFS <sub>10</sub> | Pt          | TEOA                   | Water                               | $\lambda > 420$ nm | 2000                                                            | 35        |
| CTF-T1             | Pt          | TEOA/AgNO <sub>3</sub> | Water                               | $\lambda > 420$ nm | 250                                                             | 25        |
| CTF-T2             | Pt          | TEOA/AgNO <sub>3</sub> | Water                               | $\lambda > 420$ nm | 50                                                              | 25        |
| CdsNPs/3%CTF-1     | Pt          | Lactic acid            | Water                               | $\lambda > 420$ nm | 12150                                                           | 36        |
| CTF-1-100 W        | Pt          | TEOA/MeOH              | Water                               | 300 W Xe           | 360                                                             | 27        |
| CTF-1-100 W        | none        | TEOA/MeOH              | Water                               | 300 W Xe           | 5                                                               | 27        |
| 2wt%Pt/CTF-1-100 W | Pt          | TEOA/MeOH              | Water                               | 300 W Xe           | 5500                                                            | 27        |
| CTF-CN             | Pt          | TEOA/MeOH              | Water                               | 300 W Xe           | 480                                                             | This work |

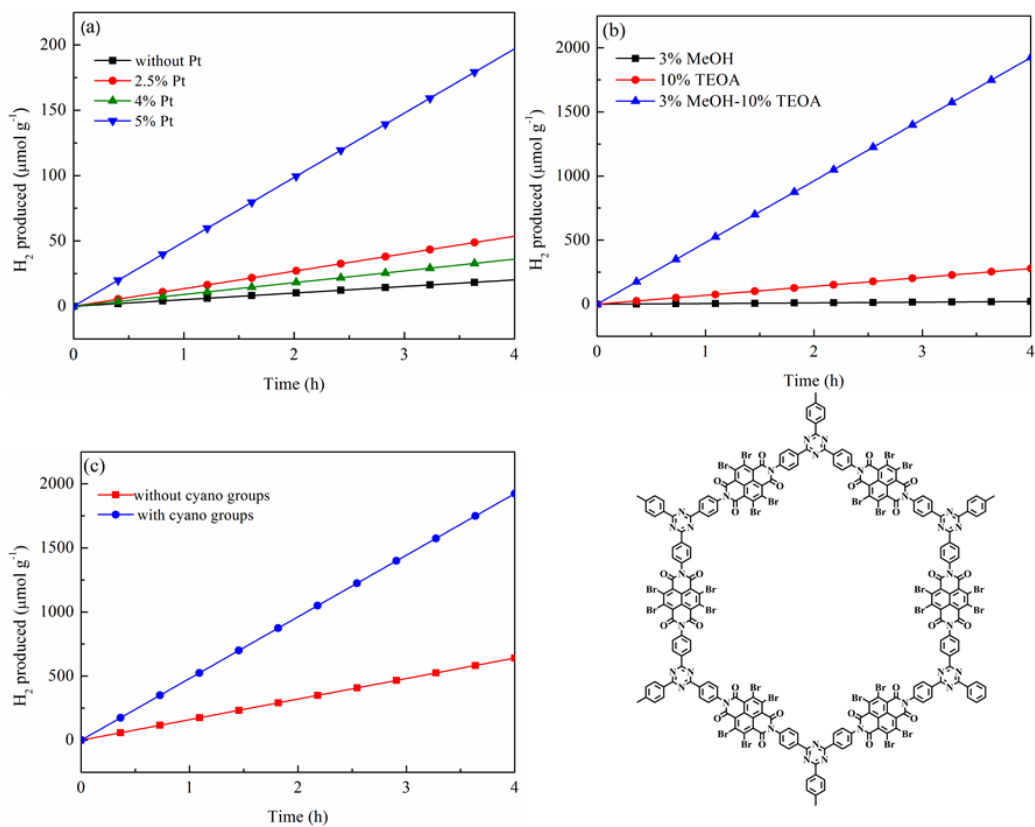

FIGURE S4: (a) H<sub>2</sub> production data for CTF-CN with different co-catalyst Pt content, (b) H<sub>2</sub> production data for CTF-CN with different sacrifices, and (c) H<sub>2</sub> production data for CTF-CN and CTF(without cyano groups).

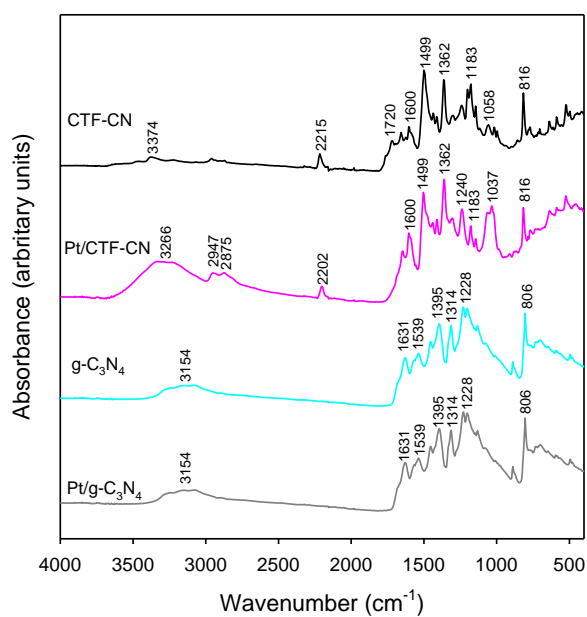

FIGURE S5: FT-IR absorbance spectra for CTF-CN and g-C<sub>3</sub>N<sub>4</sub> before and after the H<sub>2</sub> production tests. During the H<sub>2</sub> production tests, aqueous Pt(II) was photoreduced to Pt<sup>0</sup> on the surface of the photocatalyst.

TABLE S6: Summarized H<sub>2</sub> production data for various Pt/g-C<sub>3</sub>N<sub>4</sub> photocatalysts

| Catalyst                                                        | Pt<br>(wt. %) | H <sub>2</sub> rate<br>( $\mu\text{mol g}_{\text{Catal}}^{-1} \text{h}^{-1}$ ) | Sacrificial agent   | Wavelength<br>nm | Lamp power/Flux                                            | ref |
|-----------------------------------------------------------------|---------------|--------------------------------------------------------------------------------|---------------------|------------------|------------------------------------------------------------|-----|
| g-C <sub>3</sub> N <sub>4</sub> /Cu <sub>2</sub> O              | 3             | 241                                                                            | TEOA, 10 vol.%      | >420             | Xe 300W/not given                                          | 16  |
| g-C <sub>3</sub> N <sub>4</sub> /In <sub>2</sub> O <sub>3</sub> | 0.5           | 1                                                                              | ascorbic acid 0.1 M | >420             | Xe 300W/200mWcm <sup>-2</sup>                              | 13  |
| g-C <sub>3</sub> N <sub>4</sub>                                 | 3             | 3300                                                                           | TEOA, 10 vol.%      | >395             | Xe 300W/not given                                          | 6   |
| g-C <sub>3</sub> N <sub>4</sub> /TiO <sub>2</sub>               | 1             | ca.330 <sup>a</sup>                                                            | TEOA, 10 vol.%      | >400             | Xe 300W/not given                                          | 4   |
| g-C <sub>3</sub> N <sub>4</sub> /CdS                            | 0.5           | 4500 <sup>b</sup> (2500) <sup>c</sup>                                          | ascorbic acid 0.1 M | >420             | Xe 300W/not given<br>QY = 8%                               | 14  |
| g-C <sub>3</sub> N <sub>4</sub> /Zn                             | 0.5           | 60                                                                             | methanol, 25 vol.%  | >420             | Xe 200W<br>QY = 3.2% at 420nm and<br>0.8mW/cm <sup>2</sup> | 12  |
| g-C <sub>3</sub> N <sub>4</sub> /MoS <sub>2</sub>               | 1             | 230 <sup>d</sup>                                                               | methanol, 25 vol.%  | >400             | Xe 300W<br>QY = 2.8%                                       | 15  |
| g-C <sub>3</sub> N <sub>4</sub>                                 | 3             | 140                                                                            | TEOA, 10 vol.%      | >420             | Hg 500W/not given                                          | 2   |
| g-C <sub>3</sub> N <sub>4</sub>                                 | 3             | 100                                                                            | TEOA, 10 vol.%      | >420             | Xe 300W<br>QY=0.1% (420-460nm)                             | 1   |
| g-C <sub>3</sub> N <sub>4</sub>                                 | 3             | 470 <sup>e</sup>                                                               | TEOA, 10 vol.%      | >400             | Xe 300W/solar filter                                       | 3   |
| g-C <sub>3</sub> N <sub>4</sub> /CQD <sup>f</sup>               | 0             | 575 <sup>g</sup>                                                               | none                | >420             | Xe 300W/<br>QY = 16% (410-430 nm)                          | 7   |

- a. Rate based on a 3 h reaction period
- b. Hydrogen production is not linear (decreases with time).
- c. Hydrogen production rate over hybrid
- d. Hydrogen production rate decreased with time
- e. BET surface area = 70 m<sup>2</sup>/g



- f. Carbon quantum dots
- g. BET surface area = 93 m<sup>2</sup>/g
- h. BET surface area = 10 m<sup>2</sup>/g

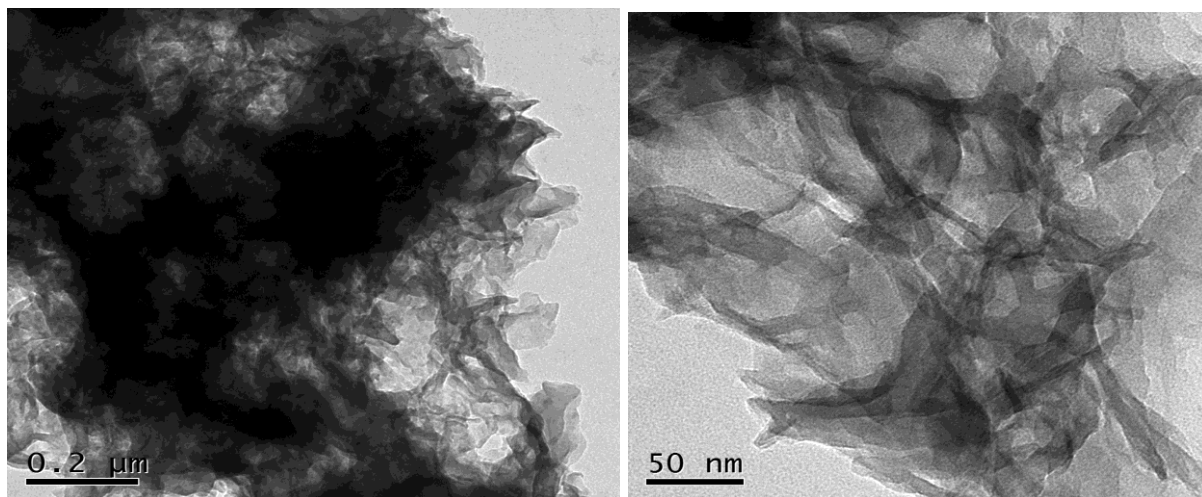

FIGURE S6: TEM images of CTF-CN synthesized using the microwave method
